# Supplementary material
Source: PubMed Central journal article supplement (PMC8274604)
Supplement: jvi.00327-21-s0003.pdf [file jvi.00327-21-s0003.pdf]

Supplementary Table 1:

Host protein-coding genes differentially expressed in HeLa cells transfected with siLRUN for 96 h

Supplementary Table 2:

Host cellular pathways impacted by ILRUN knockdown in HeLa cells
